# Supplementary material for: Carotenoid biosynthesis and sequestration in red chilli pepper fruit and its impact on colour intensity traits
Source: PubMed Central journal article supplement — J Exp Bot. 2019 Mar 1;70(10):2637–50. doi: 10.1093/jxb/erz086 (PMC6506829; doi:10.1093/jxb/erz086), 2019-03-01
Supplement: erz086_suppl_supplementary_figures_s1-s3.pdf [file erz086_suppl_supplementary_figures_s1-s3.pdf]

## Supplemental material – Figures

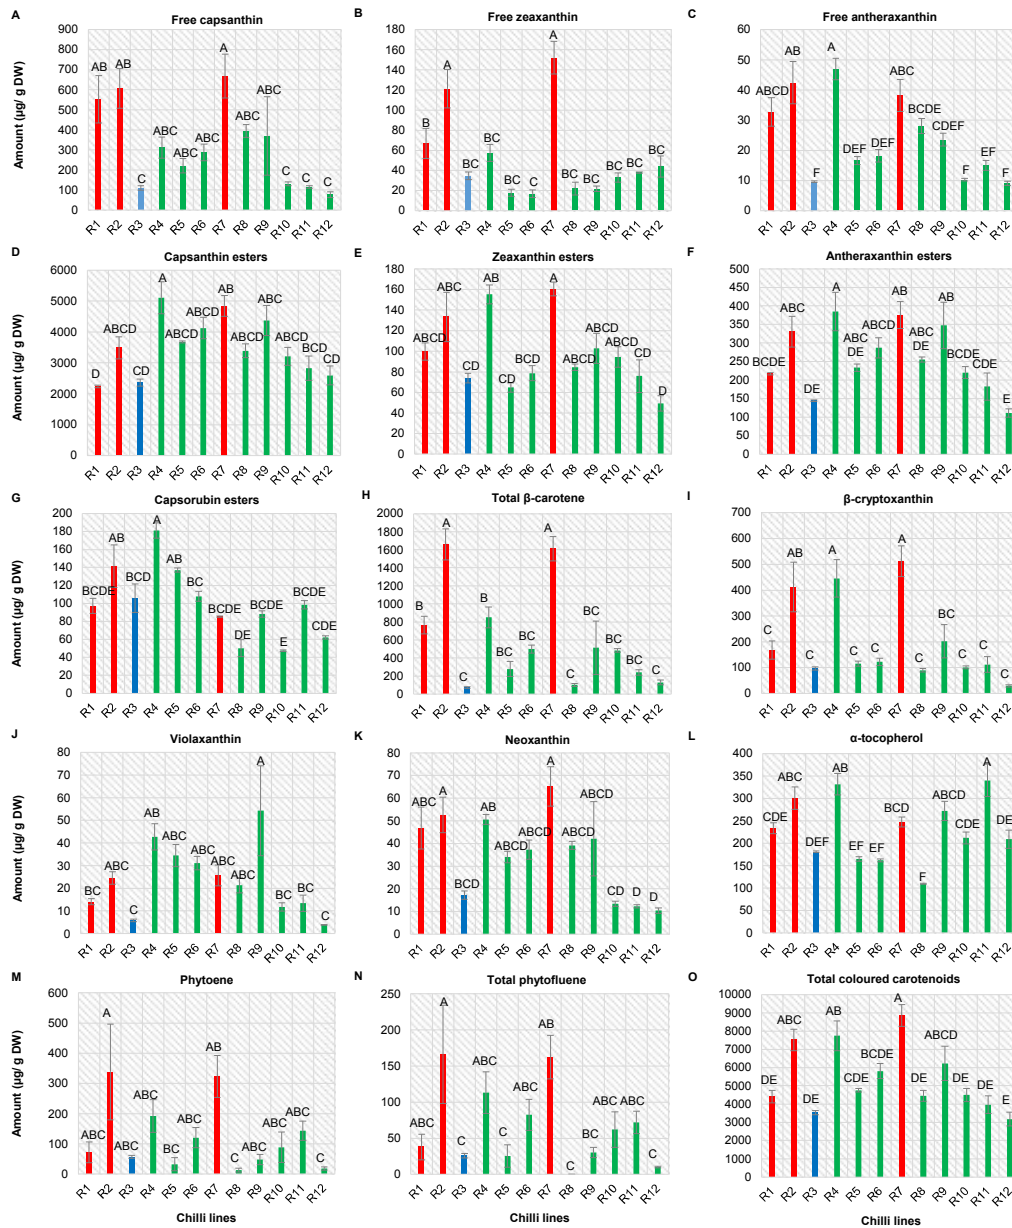

**Fig S1. Summary of carotenoid content in ripe fruit.**

12 lines were subjected to HPLC-PDA and the carotenoids identified were quantified based on carotenoid standards. One way ANOVA with tukey post-hoc statistical analysis was carried out and lines grouped based on their significance within the panel of lines ( $P < 0.05$ ). Error bars represent  $\pm\text{SE}$  (n=3). Bar colour represents: red, high intensity; green, medium intensity; blue, low intensity. Total coloured carotenoids represents the sum of all carotenoids identified (neoxanthin, violaxanthin, antheraxanthin, capsanthin, zeaxanthin,  $\beta$ -cryptoxanthin,  $\beta$ -carotene, and capsorubin) excluding phytoene and phytofluene.

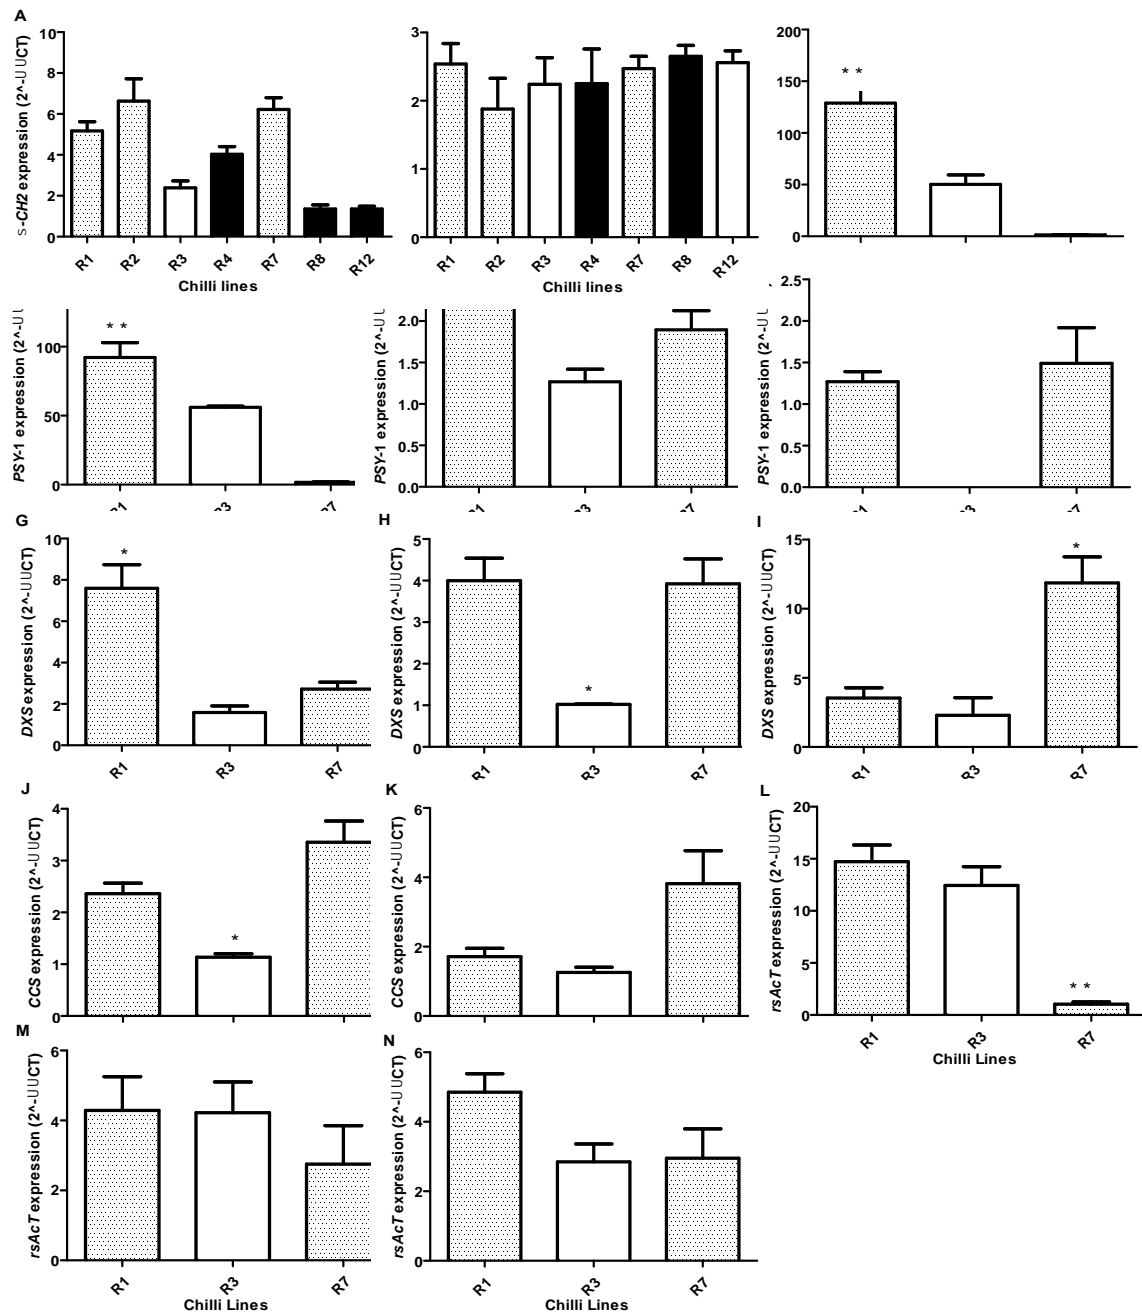

**Fig S2. Direct comparisons of gene expression analysis: *PSY-1*, *PSY-2*, *DXS* and acyl transferase.**

A comparison of *-CHY2* (A) and *CCS* (B) expression across the panel in ripe fruit. A direct comparison of *PSY-1* expression (C) breaker, (D) breaker plus 3 days, (E) breaker plus 10 days, (F) breaker plus 14 days. A direct comparison of relative *DXS* expression at (G) breaker plus 3 days, (H) breaker plus 7 days, and (I) breaker plus 10 days. *CCS* expression was directly compared at (J) breaker plus 7 days and (K) breaker plus 10 days. A direct comparison of the ripening specific acyl transferase at (L) breaker plus 3 days, (M) breaker plus 7 days, and (N) breaker plus 10 days. Error bars represent  $\pm$  SE (n=3). Key: spotted bars, high intensity lines; white bars, low intensity lines; \*,  $P < 0.05$ ; \*\*,  $P < 0.01$ .

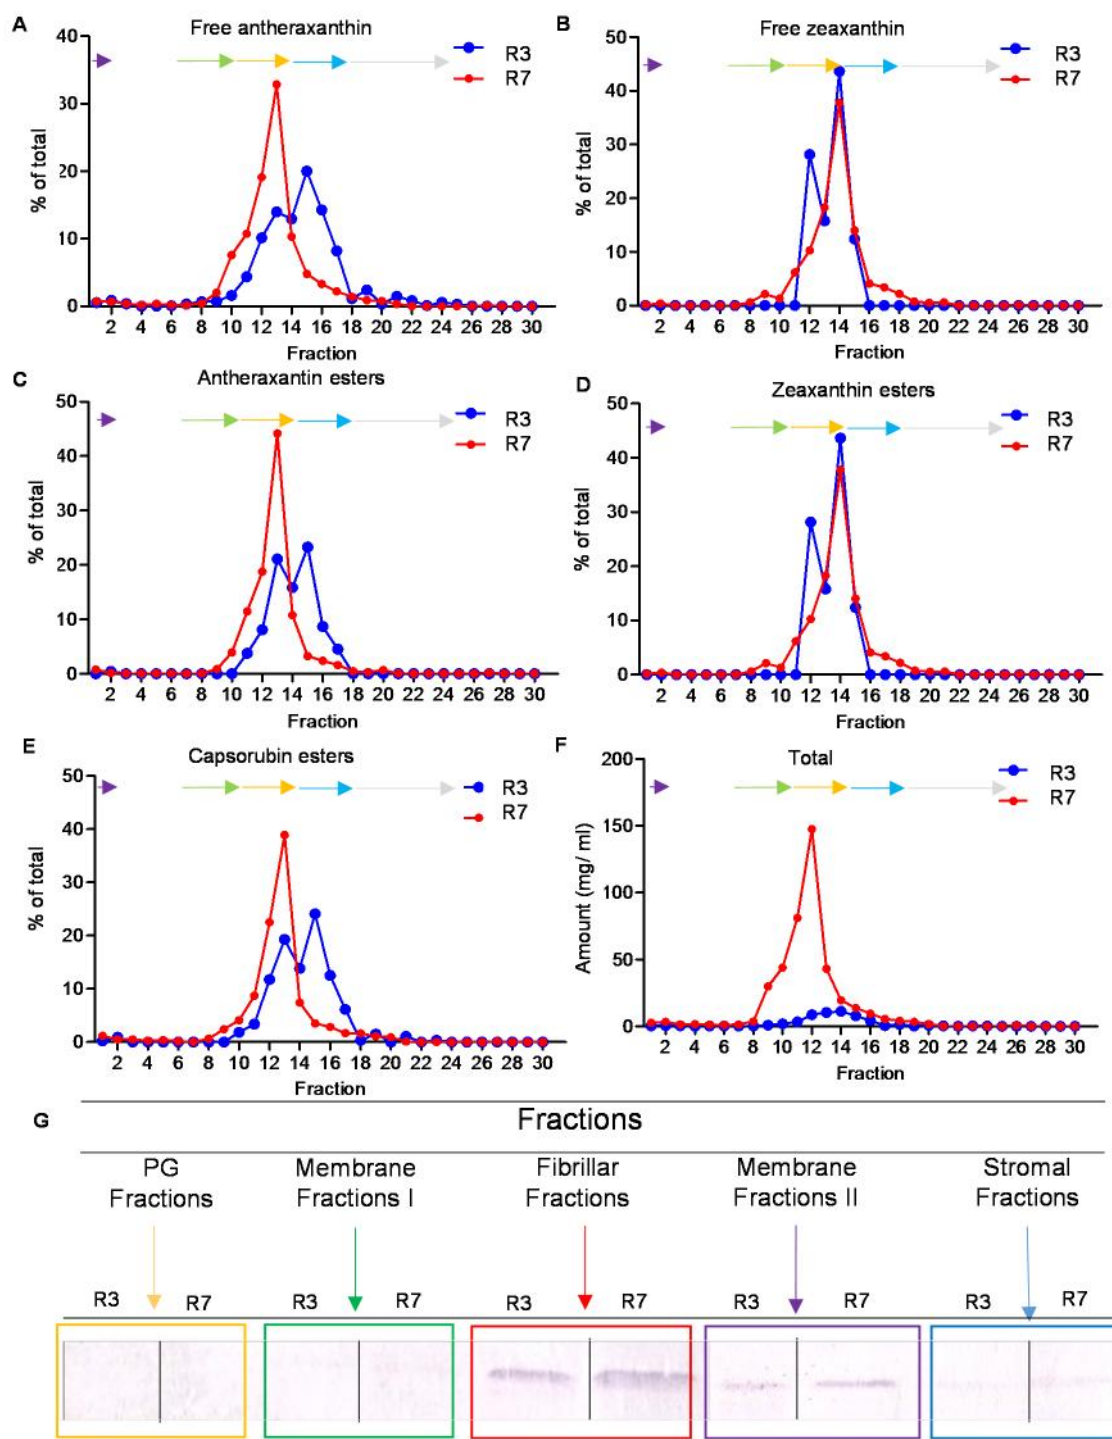

**Fig S3. Distribution of pigments and subplastid localisation of PSY across the gradient in a low and high intensity line.**

(A-E) Percentage of carotenoids across the gradient (=100% total amount found throughout) in R3 (blue) and R7 (red). (F) Total amount of pigments across the gradient. (G) Immunoblot of PSY across specific subplastid fractions in a low (left-side of box) and high (Right-side of box) intensity line.
