# Supplementary material for: Carotenoid biosynthesis and sequestration in red chilli pepper fruit and its impact on colour intensity traits
Source: PubMed Central journal article supplement — J Exp Bot. 2019 Mar 1;70(10):2637–50. doi: 10.1093/jxb/erz086 (PMC6506829; doi:10.1093/jxb/erz086), 2019-03-01
Supplement: erz086_suppl_supplementary_table_s1-s6.pdf [file erz086_suppl_supplementary_table_s1-s6.pdf]

## Supplemental Material – Tables

**Table S1. Colour intensity phenotypes of the *Capsicum annuum* colour discovery panel used in this study.**

Photographs and colour intensity phenotype data for all lines from the colour discovery panel. Colour intensity phenotype was allocated by Syngenta.

| Line | Colour intensity phenotype | Description of ripe fruit         |                                                                                       |
|------|----------------------------|-----------------------------------|---------------------------------------------------------------------------------------|
| R1   | High                       | Small; thick walled; smooth skin  |    |
| R2   | High                       | Long; thin walled; wrinkled skin  |   |
| R3   | Low                        | Small; thin walled; smooth skin   |  |
| R4   | Medium                     | Long; thick walled; smooth skin   |  |
| R5   | Medium                     | Medium; thick walled; smooth skin |  |

|     |        |                                    |                                                                                       |
|-----|--------|------------------------------------|---------------------------------------------------------------------------------------|
| R6  | Medium | Medium; thick walled; smooth skin  |    |
| R7  | High   | Long, medium walled, wrinkled skin |    |
| R8  | Medium | Small; thin walled; smooth skin    |    |
| R9  | Medium | Long, thin walled, smooth skin     |   |
| R10 | Medium | Medium, thin walled, smooth skin   |  |
| R11 | Medium | Long; thick walled; smooth skin    |  |
| R12 | Medium | Small, thin walled; smooth skin    |  |

**Table S2. Carotenoid and carotenoid esters identified in red ripe chilli pepper fruit using HPLC-PDA and LC-MS.**

Chromatographic and spectral properties of non-saponified carotenoid extracts prepared from ripe chilli pepper fruit from a high intensity, high retention line (R1). Analysis was performed by HPLC-DAD and LC-MS, compounds with no entry in the MS columns were identified using standards run on the HPLC-DAD. Key: RT, Retention Time.

| Peak No. | RT (min) | $\lambda_{\max}$ (nm) | [M+H] <sup>+</sup>   | MS/MS | $\Delta m/z$        | Compound                            |
|----------|----------|-----------------------|----------------------|-------|---------------------|-------------------------------------|
| 1        | 11.1     | 286                   | -                    | -     | -                   | $\alpha$ -Tocopherol                |
| 2        | 20.1     | 286                   | -                    | -     | -                   | Phytoene                            |
| 3        | 21.6     | 350                   | -                    | -     | -                   | Phytofluene-1                       |
| 4        | 23.3     | 350                   | -                    | -     | -                   | Phytofluene-2                       |
| 5        | 10.5     | 439, 468              | 601.4242             | -     | -                   | Violaxanthin                        |
| 6        | 10.8     | 436.7,<br>464.5       | -                    | -     | -                   | Neoxanthin                          |
| 7        | 13.1     | 445.1,<br>472.9       | -                    | -     | -                   | Antheraxanthin                      |
| 8        | 16.2     | 475.3                 | 585.4295<br>567.4195 | -     | 18(OH)              | Capsanthin                          |
| 9        | 17.1     | 450, 479              | -                    | -     | -                   | Zeaxanthin                          |
| 10       | 22.1     | 442.7, 479            | -                    | -     | -                   | Antheraxanthin<br>(monoester)       |
| 11       | 22.6     | 453, 481              | -                    | -     | -                   | $\beta$ -Cryptoxanthin              |
| 12       | 24.4     | 448.8,<br>472.9       | -                    | -     | -                   | Antheraxanthin<br>(monoester)       |
| 13       | 25.1     | 447.5,<br>474.1       | -                    | -     | -                   | Antheraxanthin<br>(monoester)       |
| 14       | 25.9     | 469.3                 | 767.5960<br>567.4184 | -     | 200.1776<br>(C12:0) | Capsanthin-<br>C12:0<br>(monoester) |

|           |             |                 |                                              |                                  |                                                                     |                                         |
|-----------|-------------|-----------------|----------------------------------------------|----------------------------------|---------------------------------------------------------------------|-----------------------------------------|
| <b>15</b> | <b>26.3</b> | 471.7           | 795.6285<br>567.4196                         | -                                | 228.2089<br>(C14:0)                                                 | Capsanthin-<br>C14:0<br>(monoester)     |
| <b>16</b> | <b>26.9</b> | 446.3,<br>475.3 | -                                            | -                                | -                                                                   | Antheraxanthin<br>(monoester)           |
| <b>17</b> | <b>27.6</b> | 453.6,<br>479   | -                                            | -                                | -                                                                   | $\beta$ -carotene-1                     |
| <b>18</b> | <b>28.2</b> | 474.3           | -                                            | -                                | -                                                                   | Capsanthin-<br>C16:0<br>(monoester)     |
| <b>19</b> | <b>28.6</b> | 453.6,<br>472.9 | -                                            | -                                | -                                                                   | $\beta$ -carotene-2                     |
| <b>20</b> | <b>29</b>   | 445.1,<br>474.1 | -                                            | -                                | -                                                                   | Antheraxanthin<br>(diester)             |
| <b>21</b> | <b>29.2</b> | 494.7           | 965.7600<br>565.4035                         | -                                | 400.3565<br>(2xC12:0)                                               | Capsorubin-<br>C12:0-C12:0<br>(diester) |
| <b>22</b> | <b>29.7</b> | 466.9           | 993.7906<br>793.6125<br>765.5815<br>565.4031 | -                                | 200.1782<br>(C12:0);<br>228.2043<br>(C14:0)                         | Capsorubin-<br>C12:0-C14:0<br>(diester) |
| <b>23</b> | <b>30.5</b> | 457.2,<br>481.4 | 961.8004<br>761.6233<br>733.5926<br>533.414  | -                                | 200.1781<br>(C12:0)<br>228.2078<br>(C14:0)<br>428.3862<br>(C12+C14) | Zeaxanthin-<br>C12:0-C14:0<br>(diester) |
| <b>24</b> | <b>30.5</b> | 457.2           | -                                            | 989.8313<br>761.6226<br>533.4147 | 228.2087<br>(C14:0)<br>446.4166<br>(2xC14:0)                        | Zeaxanthin-<br>C14:0-C14:0<br>(diester) |
| <b>25</b> | <b>31</b>   | 451.2           | -                                            | -                                | -                                                                   | Zeaxanthin<br>(diester)                 |

|           |             |                 |                                                   |                                                                                                                              |                                                                     |                                         |
|-----------|-------------|-----------------|---------------------------------------------------|------------------------------------------------------------------------------------------------------------------------------|---------------------------------------------------------------------|-----------------------------------------|
| <b>26</b> | <b>31.5</b> | 448.8,<br>471.7 | -                                                 | -                                                                                                                            | -                                                                   | Antheraxanthin<br>(diester)             |
| <b>27</b> | <b>32.1</b> | 476.6           | 949.7634<br>749.5860<br>549.4116                  | MS <sup>2</sup> (749.5860)<br>549.5753<br>MS <sup>2</sup> (949.7634)<br>549.4105                                             | 200.0107<br>(C12:0)<br>400.3529<br>(2xC12:0)                        | Capsanthin-<br>C12:0-C12:0<br>(diester) |
| <b>28</b> | <b>32.8</b> | 440.3,<br>471.7 | -                                                 | -                                                                                                                            | -                                                                   | Antheraxanthin<br>(diester)             |
| <b>29</b> | <b>33</b>   | 480.2           | 977.7948<br>777.7644<br>749.5860<br>549.4081      | MS <sup>2</sup> (977.9441)<br>777.6167<br>MS <sup>2</sup> (777.6172)<br>549.4093<br>MS <sup>2</sup> (749.5864)<br>549.4081   | 200.3274<br>(C12:0)<br>228.2079<br>(C14:0)<br>200.1783<br>(C12:0)   | Capsanthin-<br>C12:0-C14:0<br>(diester) |
| <b>30</b> | <b>33.9</b> | 474.1           | 1005.8266<br>777.6176<br>749.5863<br>549.4093     | MS <sup>2</sup> (1006.0266)<br>778.6251<br>MS <sup>2</sup> (1006.0266)<br>549.4047<br>MS <sup>2</sup> (777.6176)<br>549.4080 | 227.4015<br>(C14:0)<br>456.6219<br>(2xC14:0)<br>228.2096<br>(C14:0) | Capsanthin-<br>C14:0-C14:0<br>(diester) |
| <b>31</b> | <b>34.9</b> | 475.3           | 1033.857<br>6<br>805.7760<br>777.7598<br>549.4087 | MS <sup>2</sup> (1034.0387)<br>549.4125<br>MS <sup>2</sup> (805.6504)<br>549.4058<br>MS <sup>2</sup> (777.6182)<br>549.4101  | 484.6416<br>(C14:0,<br>C16:0)<br>256.2446<br>(C16:0)                | Capsanthin-<br>C14:0-C16:0<br>(diester) |
| <b>32</b> | <b>35.8</b> | 475.3           | 1061.889<br>7<br>805.6498<br>549.409              | MS <sup>2</sup> (1062.4010)<br>805.6547<br>MS <sup>2</sup> (805.6475)<br>549.409                                             | 256.7463<br>(C16:0)<br>256.2389<br>(C16:0)                          | Capsanthin-<br>C16:0-C16:0<br>(diester) |
| <b>33</b> | <b>36.4</b> | 449, 475        | 1045.894<br>3<br>789.6546<br>533.4140             | MS <sup>2</sup> (1045.8943)<br>533.4401<br>MS <sup>2</sup> (789.6546)<br>533.4219                                            | 256.2327<br>(C16:0)<br>256.2327<br>(C16:0)                          | Zeaxanthin-<br>C16:0-C16:0<br>(diester) |

**Table S3. Carotenoid content throughout ripening in 8 selected lines.**

The carotenoid content ( $\mu\text{g/g DW}$ ) for selected lines was analysed in 6 stages of ripening to observe biosynthesis and accumulation over the ripening process. The stages were (A) mature green (MG), (B) breaker (B), (C) breaker plus 3 days (B+3), (D) breaker plus 7 days (B+7), (E) breaker plus 10 days (B+10), and (F) breaker plus 14 days (B+14). The ripening length within the colour diversity panel varied, thus resulting in some lines displaying longer ripening lengths than others. Values discussed in the text are shown in bold. Statistical analysis was carried out using ANOVA ( $P \leq 0.05$ ). The  $\pm\text{SE}$  was calculated ( $n=3$ ). Key: -, not detected.

**A MG**

| Carotenoids          | R1                                             | R2                                              | R3                                              | R4                                              | R7                                             | R8                                             | R11                                              | R12                                              |
|----------------------|------------------------------------------------|-------------------------------------------------|-------------------------------------------------|-------------------------------------------------|------------------------------------------------|------------------------------------------------|--------------------------------------------------|--------------------------------------------------|
| Violaxanthin         | 40.76<br>$\pm 16.42$                           | 86.73<br>$\pm 15.70$                            | 46.91<br>$\pm 2.81$                             | 160.27<br>$\pm 24.32$                           | 62.27<br>$\pm 5.19$                            | 84.49<br>$\pm 20.56$                           | 128.03<br>$\pm 20.52$                            | 44.78<br>$\pm 8.07$                              |
| Neoxanthin           | 15.88<br>$\pm 4.76$                            | 13.49<br>$\pm 3.61$                             | 6.66<br>$\pm 0.75$                              | 52.91<br>$\pm 8.15$                             | 11.71<br>$\pm 1.68$                            | 27.11<br>$\pm 2.50$                            | 55.85<br>$\pm 7.98$                              | 37.83<br>$\pm 4.73$                              |
| Antheraxanthin       | 17.33<br>$\pm 0.88$                            | 17.60<br>$\pm 3.15$                             | 10.36<br>$\pm 0.39$                             | 35.52<br>$\pm 2.46$                             | 13.87<br>$\pm 2.54$                            | 18.37<br>$\pm 1.70$                            | 22.96<br>$\pm 3.00$                              | 16.97<br>$\pm 3.21$                              |
| Chlorophyll B        | 412.42<br>$\pm 57.8$                           | 646.13<br>$\pm 139.87$                          | 253.04<br>$\pm 24.08$                           | 1066.73<br>$\pm 103.31$                         | 310.91<br>$\pm 26.88$                          | 704.43<br>$\pm 38.80$                          | 960.06<br>$\pm 150.20$                           | 740.12<br>$\pm 64.91$                            |
| Lutein               | <b>463.85</b><br><b><math>\pm 44.86</math></b> | <b>856.08</b><br><b><math>\pm 181.35</math></b> | <b>399.90</b><br><b><math>\pm 51.48</math></b>  | <b>1079.31</b><br><b><math>\pm 82.33</math></b> | <b>357.51</b><br><b><math>\pm 37.75</math></b> | <b>756.68</b><br><b><math>\pm 44.45</math></b> | <b>1120.54</b><br><b><math>\pm 136.65</math></b> | <b>825.00</b><br><b><math>\pm 64.07</math></b>   |
| Zeaxanthin           | <b>14.21</b><br><b><math>\pm 1.72</math></b>   | 3.72<br>$\pm 0.93$                              | 2.70<br>$\pm 1.11$                              | 17.90<br>$\pm 4.79$                             | 3.30<br>$\pm 0.85$                             | 13.31<br>$\pm 4.09$                            | 4.98<br>$\pm 2.17$                               | 4.29<br>$\pm 0.60$                               |
| Chlorophyll A        | 256.5 $\pm$<br>215.47                          | 183.62<br>$\pm 15.70$                           | <b>344.92</b><br><b><math>\pm 108.61</math></b> | -                                               | 102.54<br>$\pm 11.07$                          | <b>641.86</b><br><b><math>\pm 57.30</math></b> | <b>1436.05</b><br><b><math>\pm 470.20</math></b> | <b>1354.50</b><br><b><math>\pm 132.68</math></b> |
| $\beta$ -carotene    | 69.34<br>$\pm 35.85$                           | 119.80<br>$\pm 24.87$                           | 53.27<br>$\pm 5.64$                             | 149.03<br>$\pm 14.37$                           | 40.08<br>$\pm 3.30$                            | 122.57<br>$\pm 7.11$                           | 88.95<br>$\pm 11.08$                             | 77.36<br>$\pm 5.55$                              |
| $\alpha$ -tocopherol | 59.10<br>$\pm 10.60$                           | 88.35<br>$\pm 10.23$                            | 84.99<br>$\pm 7.18$                             | 140.11<br>$\pm 22.62$                           | 61.60<br>$\pm 5.40$                            | 134.02<br>$\pm 14.70$                          | 144.73<br>$\pm 10.35$                            | 63.12<br>$\pm 11.45$                             |
| Total carotenoid     | 621.36<br>$\pm 94.26$                          | 1097.41<br>$\pm 220.59$                         | 519.79<br>$\pm 58.14$                           | 1494.94<br>$\pm 122.16$                         | 488.74<br>$\pm 41.73$                          | 1022.53<br>$\pm 73.40$                         | 1421.30<br>$\pm 173.77$                          | 1006.22<br>$\pm 83.39$                           |

**B B**

| Carotenoids    | R1                    | R2                    | R3                    | R4                                           | R7                    | R8                    | R11                   | R12                   |
|----------------|-----------------------|-----------------------|-----------------------|----------------------------------------------|-----------------------|-----------------------|-----------------------|-----------------------|
| Violaxanthin   | 11.47<br>$\pm 0.24$   | 33.35<br>$\pm 3.28$   | 22.45<br>$\pm 6.60$   | <b>47.97</b><br><b><math>\pm 1.58</math></b> | 18.81<br>$\pm 2.95$   | 25.52<br>$\pm 6.43$   | 39.10<br>$\pm 7.11$   | 22.09<br>$\pm 1.93$   |
| Neoxanthin     | 7.35<br>$\pm 1.02$    | 33.44<br>$\pm 10.4$   | 8.26<br>$\pm 1.77$    | <b>81.74</b><br><b><math>\pm 2.33</math></b> | 10.36<br>$\pm 3.18$   | 24.87<br>$\pm 3.78$   | 33.11<br>$\pm 2.90$   | 6.80<br>$\pm 1.92$    |
| Antheraxanthin | 15.36<br>$\pm 0.77$   | 19.96<br>$\pm 3.14$   | 7.33<br>$\pm 2.38$    | <b>36.82</b><br><b><math>\pm 4.44</math></b> | 14.05<br>$\pm 1.21$   | 26.09<br>$\pm 1.27$   | 26.68<br>$\pm 0.66$   | 26.28<br>$\pm 0.86$   |
| Chlorophyll B  | 293.32<br>$\pm 36.09$ | 441.06<br>$\pm 40.98$ | 136.58<br>$\pm 33.23$ | 706.85<br>$\pm 21.39$                        | 198.60<br>$\pm 25.39$ | 554.76<br>$\pm 59.80$ | 557.84<br>$\pm 69.20$ | 226.61<br>$\pm 7.41$  |
| Lutein         | -                     | 472.07<br>$\pm 33.76$ | 251.59<br>$\pm 41.31$ | 877.27<br>$\pm 56.42$                        | 176.99<br>$\pm 28.66$ | 636.19<br>$\pm 88.32$ | 897.55<br>$\pm 70.59$ | 396.81<br>$\pm 42.87$ |

|                   |                              |                              |                  |                                 |                               |                                  |                                 |                   |
|-------------------|------------------------------|------------------------------|------------------|---------------------------------|-------------------------------|----------------------------------|---------------------------------|-------------------|
| Capsanthin        | 48.11±<br>11.42              | 34.82<br>±9.74               | 25.07<br>±13.54  | <b>23.21</b><br><b>±8.19</b>    | 56.86<br>±15.62               | 60.47<br>±21.01                  | 8.41<br>±1.75                   | 40.37<br>±13.70   |
| Zeaxanthin        | 78.26<br>±4.19               | 36.74<br>±21.25              | 26.32<br>±15.19  | 77.80<br>±18.35                 | 18.03<br>±3.07                | 155.57<br>±30.27                 | 42.64<br>±15.49                 | 180.41<br>±21.12  |
| Chlorophyll A     | 79.11<br>±0.31               | 129.55<br>±11.32             | 64.30<br>±20.38  | -                               | 33.79<br>±6.00                | 337.96<br>±78.36                 | 112.73<br>±14.58                | 82.59<br>±14.23   |
| β-cryptoxanthin   | 32.67<br>±3.47               | 22.47<br>±5.68               | 18.72<br>±9.85   | 30.60<br>±4.32                  | 13.71<br>±3.96                | 21.69<br>±3.88                   | -                               | 49.68<br>±8.04    |
| β-carotene        | 159.90<br>±6.54              | 108.61<br>±16.42             | 73.08<br>±16.51  | 134.77<br>±3.74                 | 52.86<br>±8.24                | 108.40<br>±37.91                 | 77.77<br>±4.42                  | 101.57<br>±15.63  |
| Capsanthin esters | <b>37.28</b><br><b>±6.31</b> | <b>20.60</b><br><b>±3.93</b> | -                | -                               | <b>46.17</b><br><b>±15.69</b> | -                                | -                               | -                 |
| Zeaxanthin esters | 40.66<br>±7.71               | -                            | 104.88<br>±32.18 | -                               | -                             | 44.31<br>±23.82                  | -                               | 53.22<br>±20.56   |
| α-tocopherol      | 59.58<br>±1.31               | 77.19<br>±7.94               | 64.96<br>±9.69   | 143.74<br>±11.40                | 58.19<br>±4.11                | 225.11<br>±27.00                 | 152.54<br>±6.88                 | 83.47<br>±9.80    |
| Total carotenoid  | 431.05<br>±23.90             | 798.16<br>±109.58            | 472.74<br>±67.12 | <b>1310.18</b><br><b>±52.04</b> | 403.28<br>±53.80              | <b>1114.78</b><br><b>±107.42</b> | <b>1135.56</b><br><b>±66.71</b> | 860.66<br>±101.39 |

**C B+3**

| <b>Carotenoids</b> | <b>R1</b>                       | <b>R2</b>                      | <b>R3</b>                       | <b>R4</b>        | <b>R7</b>                     | <b>R8</b>                       | <b>R11</b>       | <b>R12</b>       |
|--------------------|---------------------------------|--------------------------------|---------------------------------|------------------|-------------------------------|---------------------------------|------------------|------------------|
| Violaxanthin       | 9.14<br>±0.29                   | 21.72<br>±7.42                 | -                               | 25.95<br>±6.99   | 50.16<br>±3.42                | 15.25<br>±8.07                  | 11.18<br>±0.92   | -                |
| Neoxanthin         | 5.58<br>±3.36                   | <b>80.46</b><br><b>±32.14</b>  | -                               | 17.01<br>±2.24   | 19.22<br>±1.86                | <b>23.48</b><br><b>±11.02</b>   | 19.98<br>±2.98   | 13.05<br>±2.07   |
| Antheraxanthin     | 25.81<br>±6.24                  | <b>43.55</b><br><b>±3.79</b>   | 3.19<br>±1.62                   | 50.08<br>±0.46   | 27.41<br>±4.22                | 23.55<br>±3.56                  | 27.72<br>±0.97   | 32.43<br>±4.82   |
| Chlorophyll B      | 202.14±7<br>6.45                | 430.6±1<br>43.51               | 11.20<br>±2.65                  | 220.49<br>±27.95 | 275.48<br>±16.47              | 340.81<br>±170.90               | 191.42<br>±17.05 | 83.55<br>±55.65  |
| Lutein             | -                               | 272.55<br>±97.05               | 16.98<br>±4.18                  | 222.86<br>±23.34 | 129.08<br>±2.52               | 515.19<br>±209.54               | 417.59<br>±58.02 | 181.73<br>±91.12 |
| Capsanthin         | 209.76±2<br>9.32                | 265.35<br>±96.09               | 89.08<br>±34.50                 | 227.66<br>±25.64 | <b>96.52</b><br><b>±30.75</b> | 113.00<br>±34.67                | 62.85<br>±7.42   | 104.14<br>±13.36 |
| Zeaxanthin         | 136.23±2<br>8.61                | 97.74<br>±40.09                | 54.64<br>±14.95                 | 159.48<br>±26.48 | <b>30.16</b><br><b>±14.45</b> | 190.83<br>±38.70                | 98.33<br>±16.54  | 213.53<br>±35.44 |
| Chlorophyll A      | <b>264.22</b><br><b>±166.75</b> | <b>435.1±2</b><br><b>08.21</b> | -                               | -                | -                             | <b>492.90</b><br><b>±254.83</b> | -                | -                |
| β-cryptoxanthin    | <b>114.16</b><br><b>±14.80</b>  | <b>144.72</b><br><b>±30.38</b> | 61.85<br>±10.28                 | 113.17<br>±6.92  | 35.81<br>±11.19               | 34.36<br>±7.05                  | 31.27<br>±5.33   | 48.51<br>±11.72  |
| β-carotene         | <b>394.32</b><br><b>±22.35</b>  | <b>312.87</b><br><b>±68.43</b> | 197.18<br>±32.37                | 160.05<br>±24.26 | 66.60<br>±26.66               | 117.74<br>±3.13                 | 60.02<br>±3.58   | 127.57<br>±32.30 |
| Anther esters      | <b>37.20</b><br><b>±3.43</b>    | <b>95.78</b><br><b>±19.11</b>  | 30.91<br>±3.63                  | 41.31<br>±6.62   | -                             | 12.53<br>±3.36                  | 10.58<br>±0.25   | 28.71<br>±6.50   |
| Capsorubin esters  | <b>34.64</b><br><b>±6.40</b>    | -                              | <b>28.15</b><br><b>±3.54</b>    | -                | -                             | -                               | -                | -                |
| Capsanthin esters  | 544.49<br>±38.63                | 607.89<br>±179.70              | <b>765.93</b><br><b>±127.59</b> | 475.27<br>±42.46 | 115.74<br>±53.07              | 202.01<br>±94.13                | 141.64<br>±10.61 | 428.37<br>±89.69 |
| Zeaxanthin esters  | 159.21<br>±6.72                 | 48.58<br>±18.81                | 84.54<br>±12.58                 | 19.88<br>±7.48   | -                             | 288.96<br>±170.31               | 12.15<br>±6.15   | 54.00<br>±17.64  |
| α-tocopherol       | 114.98<br>±2.37                 | 139.89<br>±9.08                | 90.87<br>±2.04                  | 198.17<br>±12.26 | <b>67.34</b><br><b>±11.06</b> | <b>271.94</b><br><b>±33.17</b>  | 217.73<br>±22.54 | 162.33<br>±15.25 |
| Phytoene           | 35.98<br>±4.90                  | 58.18<br>±42.36                | <b>93.07</b><br><b>±25.47</b>   | 61.55<br>±8.51   | -                             | -                               | 44.84<br>±9.51   | 99.92<br>±5.23   |

|                  |                |                  |                              |                   |                   |                   |                  |                    |
|------------------|----------------|------------------|------------------------------|-------------------|-------------------|-------------------|------------------|--------------------|
| Phytofluene      | -              | -                | <b>39.55</b><br><b>±9.38</b> | 24.44<br>±5.47    | -                 | -                 | 10.25<br>±2.82   | 7.91<br>±0.79      |
| Total carotenoid | 1624<br>±72.88 | 2028.9<br>±362.1 | 1482.33<br>±108.93           | 1598.71<br>±83.75 | 558.77<br>±136.80 | 1556.79<br>±73.63 | 989.43<br>±38.84 | 1259.18<br>±145.11 |

D B+7

| Carotenoids       | R1                             | R2                              | R3                           | R4                 | R7                             | R8                 | R11                | R12                          |
|-------------------|--------------------------------|---------------------------------|------------------------------|--------------------|--------------------------------|--------------------|--------------------|------------------------------|
| Violaxanthin      | 15.59<br>±0.56                 | <b>40.02</b><br><b>±6.38</b>    | 10.98<br>±1.90               | -                  | 35.92<br>±10.51                | 33.21<br>±9.63     | 3.26<br>±3.25      | 19.22<br>±5.56               |
| Neoxanthin        | 12.09<br>±8.03                 | <b>90.91</b><br><b>±9.50</b>    | -                            | 36.06<br>±8.84     | <b>23.86</b><br><b>±2.26</b>   | 4.49<br>±0.89      | 3.54<br>±0.78      | -                            |
| Antheraxanthin    | 30.15<br>±2.97                 | <b>58.98</b><br><b>±3.27</b>    | <b>11.17</b><br><b>±3.12</b> | 57.94<br>±3.48     | <b>60.66</b><br><b>±2.48</b>   | 39.56<br>±1.14     | 25.62<br>±4.17     | <b>22.50</b><br><b>±1.05</b> |
| Chlorophyll b     | 60.02<br>±17.08                | <b>217.39</b><br><b>±7.69</b>   | -                            | 92.42<br>±7.82     | <b>257.92</b><br><b>±32.18</b> | 77.79<br>±1.76     | 45.07<br>±7.59     | <b>19.51</b><br><b>±1.72</b> |
| Lutein            | -                              | -                               | -                            | 41.12<br>±6.08     | <b>98.67</b><br><b>±25.71</b>  | 30.06<br>±11.09    | 60.94<br>±32.97    | -                            |
| Capsanthin        | 403.61±5<br>8.30               | 506.54<br>±65.45                | 92.38<br>±26.96              | 345.80<br>±14.42   | 490.84<br>±63.26               | 454.47<br>±65.09   | 110.87<br>±13.43   | 225.07<br>±9.41              |
| Zeaxanthin        | 72.85<br>±6.43                 | 111.75<br>±6.66                 | 42.85<br>±17.97              | 113.01<br>±6.21    | 99.00<br>±17.37                | 132.70<br>±8.36    | 73.36<br>±6.73     | 132.81<br>±24.90             |
| Chlorophyll a     | -                              | <b>329.56</b><br><b>±34.01</b>  | -                            | -                  | -                              | -                  | -                  | -                            |
| β-cryptoxanthin   | 225.85<br>±38.14               | <b>527.63</b><br><b>±33.98</b>  | 119.88<br>±15.24             | 228.49<br>±31.82   | 322.03<br>±73.47               | 101.50<br>±7.62    | 25.25<br>±3.91     | 99.04<br>±20.27              |
| β-carotene        | <b>891.20</b><br><b>±98.50</b> | <b>1179.96</b><br><b>±92.91</b> | 352.06<br>±51.80             | 323.23<br>±15.31   | 472.10<br>±119.77              | 171.76<br>±41.82   | 176.36<br>±12.56   | 328.80<br>±46.36             |
| Anther esters     | 176.67<br>±24.03               | <b>375.12</b><br><b>±41.13</b>  | 64.30<br>±10.89              | 129.34<br>±17.56   | 198.43<br>±44.58               | 123.99<br>±24.00   | 93.84<br>±11.61    | 80.31<br>±5.93               |
| Capsorubin esters | 176.10<br>±39.42               | 39.69<br>±6.35                  | 114.03<br>±28.34             | 32.64<br>±9.79     | -                              | -                  | 8.84<br>±11.61     | 158.60<br>±44.20             |
| Capsanthin esters | 1899.79<br>±192.45             | 2650.24<br>±199.40              | 2072.84<br>±293.56           | 1276.82<br>±158.49 | 1738.28<br>±422.79             | 1725.83<br>±365.21 | 1204.36<br>±213.81 | 1957.70<br>±14.67            |
| Zeaxanthin esters | 124.17<br>±8.45                | <b>204.87</b><br><b>±26.73</b>  | 224.92<br>±28.60             | 36.89<br>±2.84     | 26.41<br>±3.01                 | 48.51<br>±12.39    | 73.19<br>±15.74    | 113.90<br>±21.40             |
| α-tocopherol      | 172.49<br>±5.57                | 188.49<br>±15.37                | 167.06<br>±21.28             | 253.83<br>±39.10   | 172.39<br>±15.75               | 374.14<br>±7.98    | 271.11<br>±24.25   | 176.58<br>±20.65             |
| Phytoene          | 108.10<br>±28.60               | 85.97<br>±17.87                 | 154.48<br>±12.78             | 240.86<br>±57.75   | 79.27<br>±47.85                | 60.24<br>±5.88     | 560.91<br>±98.78   | 108.39<br>±20.18             |
| Phytofluene       | 49.50<br>±12.86                | 15.49<br>±3.52                  | 60.19<br>±6.71               | 99.46<br>±18.19    | 33.69<br>±22.58                | 33.61<br>±3.35     | 74.91<br>±7.52     | 39.37<br>±7.56               |
| Total carotenoid  | 4209.01<br>±392.07             | 6048.70<br>±278.58              | 3502.99<br>±453.04           | 3106.87<br>±321.49 | 3759.12<br>±769.10             | 3045.11<br>±473.27 | 2586.20<br>±192.55 | 3324.31<br>±75.68            |

E B+10

| Carotenoids    | R1             | R2                            | R3             | R4             | R7                            | R8             | R11            | R12            |
|----------------|----------------|-------------------------------|----------------|----------------|-------------------------------|----------------|----------------|----------------|
| Violaxanthin   | 26.43<br>±0.61 | <b>65.54</b><br><b>±8.16</b>  | 16.15<br>±0.26 | 10.86<br>±1.87 | <b>57.54</b><br><b>±13.97</b> | 14.62<br>±2.23 | 10.41<br>±1.96 | 10.13<br>±1.12 |
| Neoxanthin     | 18.33<br>±1.68 | <b>32.01</b><br><b>±11.37</b> | 4.81<br>±0.63  | 7.99<br>±0.43  | <b>32.90</b><br><b>±1.83</b>  | 14.18<br>±1.10 | 4.51<br>±1.36  | -              |
| Antheraxanthin | 25.97<br>±2.51 | 41.68<br>±5.84                | 9.10<br>±1.31  | 45.01<br>±1.91 | <b>53.39</b><br><b>±5.04</b>  | 38.77<br>±1.17 | 21.07<br>±3.04 | 22.62<br>±3.21 |
| Chlorophyll B  | 26.26          | 68.65                         | 7.66           | 49.38          | <b>76.42</b>                  | 67.69          | 31.17          | 20.84          |



|                   |                    |                                  |                    |                    |                                  |                    |                    |                    |
|-------------------|--------------------|----------------------------------|--------------------|--------------------|----------------------------------|--------------------|--------------------|--------------------|
|                   | ±2.10              | ±21.64                           | ±0.08              | ±4.85              | <b>±7.73</b>                     | ±1.74              | ±14.59             | ±3.32              |
| Capsanthin        | 287.20±2<br>0.11   | <b>507.08</b><br><b>±67.69</b>   | 56.16<br>±9.03     | 297.55<br>±24.89   | <b>664.60</b><br><b>±37.74</b>   | 391.93<br>±17.15   | 96.99<br>±8.01     | 178.50<br>±36.27   |
| Zeaxanthin        | 56.10<br>±1.93     | 81.18<br>±3.78                   | 21.86<br>±4.10     | 77.03<br>±8.84     | <b>109.19</b><br><b>±20.01</b>   | 131.78<br>±17.89   | 62.17<br>±7.56     | 95.87<br>±26.22    |
| β-cryptoxanthin   | 180.10<br>±8.31    | <b>758.83</b><br><b>±50.49</b>   | 135.82<br>±7.51    | 296.35<br>±27.62   | <b>595.56</b><br><b>±36.05</b>   | 155.75<br>±32.84   | 96.19<br>±14.84    | 103.83<br>±29.30   |
| β-carotene        | 720.54<br>±72.36   | <b>1954.77</b><br><b>±100.36</b> | 320.06<br>±105.59  | 636.82<br>±63.59   | <b>1940.70</b><br><b>±88.09</b>  | 417.02<br>±107.01  | 229.08<br>±22.90   | 424.55<br>±79.86   |
| Anther esters     | 181.65<br>±12.09   | <b>461.57</b><br><b>±38.49</b>   | 62.68<br>±2.31     | 203.30<br>±28.83   | <b>510.05</b><br><b>±47.84</b>   | 187.87<br>±17.29   | 135.53<br>±31.07   | 127.12<br>±2.95    |
| Capsorubin esters | 213.72<br>±21.01   | 25.77<br>±6.41                   | 118.38<br>±6.58    | 86.88<br>±8.85     | 43.14<br>±2.55                   | -                  | 50.46<br>±13.21    | 179.10<br>±22.02   |
| Capsanthin esters | 2356.79<br>±119.44 | <b>4528.57</b><br><b>±318.89</b> | 2299.42<br>±409.41 | 1849.04<br>±211.28 | <b>4228.99</b><br><b>±451.64</b> | 2335.33<br>±136.05 | 1492.85<br>±215.95 | 2760.57<br>±206.19 |
| Zeaxanthin esters | 98.90<br>±7.47     | 73.28<br>±5.71                   | 278.26<br>±51.36   | 41.01<br>±5.78     | 90.14<br>±0.19                   | 91.49<br>±3.04     | 59.95<br>±12.08    | 127.45<br>±35.15   |
| α-tocopherol      | 194.79<br>±2.83    | 303.67<br>±47.15                 | 177.67<br>±19.24   | 301.36<br>±8.16    | 271.15<br>±24.95                 | 485.78<br>±28.63   | 307.72<br>±9.85    | 208.16<br>±8.69    |
| Phytoene          | 97.37<br>±37.60    | 468.47<br>±197.02                | 103.22<br>±47.14   | 336.74<br>±24.25   | <b>377.75</b><br><b>±82.24</b>   | 129.46<br>±13.01   | 872.43<br>±277.96  | 108.39<br>±44.31   |
| Phytofluene       | 47.76<br>±15.79    | <b>220.10</b><br><b>±73.27</b>   | 37.17<br>±18.96    | 155.78<br>±15.46   | 192.17<br>±39.35                 | 70.23<br>±7.25     | 132.42<br>±35.66   | 40.18<br>±15.11    |
| Total carotenoid  | 4348.50<br>±148.22 | 9390.80<br>±587.34               | 3834.77<br>±451.32 | 4163.71<br>±355.76 | 9090.61<br>±511.14               | 4114.24<br>±56.71  | 3332.75<br>±218.99 | 3324.31<br>±75.68  |

F B+14

| Carotenoids      | R1                    | R2                    | R4                    | R7                    |
|------------------|-----------------------|-----------------------|-----------------------|-----------------------|
| Violaxanthin     | 68.05 ±17.60          | 67.18±7.39            | 26.92±3.32            | 71.74± 3.02           |
| Neoxanthin       | 14.13 ±1.36           | 26.28±3.05            | 16.14±1.50            | 33.47± 5.40           |
| Antheraxanthin   | 20.44 ±0.36           | 49.69±1.63            | 52.21±3.51            | 48.53± 4.82           |
| Chlorophyll B    | 16.48 ±4.21           | 58.35±9.31            | 39.35±1.26            | 45.70± 6.18           |
| Capsanthin       | <b>202.45 ±0.01</b>   | <b>561.50±55.20</b>   | <b>232.55±27.80</b>   | <b>617.69±52.97</b>   |
| Zeaxanthin       | 35.39±5.72            | 112.38±5.93           | 71.33±9.65            | 133.55±5.64           |
| β-cryptoxanthin  | 285.65±22.06          | 710.21±7.85           | 353.46±39.79          | 846.39±45.91          |
| β-carotene       | <b>1018.29±59.09</b>  | <b>2523.91±82.72</b>  | <b>400.45±83.31</b>   | <b>2874.48±281.86</b> |
| Anther est       | 324.85±23.68          | 555.49±20.36          | 193.60±16.21          | 534.24±43.56          |
| Capsorubin est   | 154.55±19.39          | 123.42±12.89          | 102.88±18.82          | -                     |
| Capsanthin est   | <b>3290.89±179.33</b> | <b>4686.36±237.43</b> | <b>2666.10±194.28</b> | <b>5653.29±432.50</b> |
| Zeaxanthin est   | 100.54±25.95          | 77.20±7.67            | 20.82±6.76            | 115.20±16.51          |
| α-tocopherol     | 274.92±11.07          | 389.19±19.76          | 420.79±21.76          | 376.30±47.18          |
| Phytoene         | 127.02±10.99          | 727.21±85.99          | 378.16±31.49          | 672.72±242.63         |
| Phytofluene      | 70.18±6.70            | 376.89±27.37          | 159.40±8.44           | 331.84±107.44         |
| Total carotenoid | 5848.30 ±156.99       | 11164.78 ±366.66      | 4776.358±181.222      | 12126.56 ± 1128.2     |





**Table S6. One-way ANOVA.**

(A) Phytoene synthase activity (DPM) and (B) phytoene synthase activity / molecule of enzyme (DPM/ unit area).

**A**

|                           | Significance |     |
|---------------------------|--------------|-----|
|                           | R3           | R7  |
| <b>Psy activity (DPM)</b> |              |     |
| PG vs Mem I               | ***          | *** |
| PG vs Fibril              | ***          | *** |
| PG vs Mem II              | ***          | *** |
| PG vs Stroma              | ***          | *** |
| Mem I vs Fibril           | ns           | ns  |
| Mem I vs Mem II           | ***          | *   |
| Mem I vs Stroma           | ***          | *   |
| Fibril vs Mem II          | ***          | **  |
| Fibril vs Stroma          | ***          | **  |
| Mem II vs Stroma          | ***          | ns  |

**B**

|                  | R3 v R7  | Significance |
|------------------|----------|--------------|
| <b>PG</b>        | 0.000633 | ***          |
| <b>Mem I</b>     | 0.000645 | ***          |
| <b>Fibrillar</b> | 0.004868 | ***          |
| <b>Mem II</b>    | 0.130755 | ns           |
| <b>Stroma</b>    | 0.017656 | **           |
